# Supplementary material
Source: PubMed Central journal article supplement (PMC4507127)
Supplement: Supp_Figure1.pdf [file Supp_Figure1.pdf]

## Supplementary Data

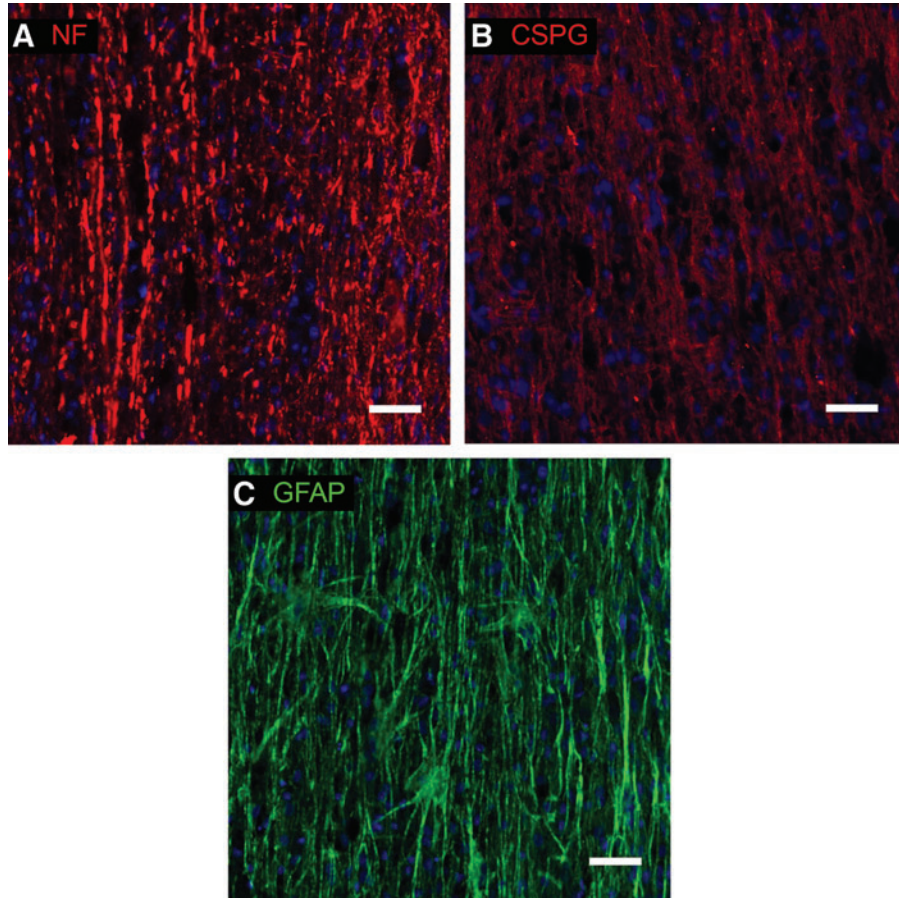

**SUPPLEMENTARY FIG. S1.** High power images of NF<sup>+</sup> axons (A), perineuronal net CSPG (B), and GFAP<sup>+</sup> astrocytes (C) in the uninjured spinal cord tissue away from the lesion site. (Scale bars: 50  $\mu$ m).
