# Supplementary material
Source: PubMed Central journal article supplement (PMC4507127)
Supplement: Supp_Figure2.pdf [file Supp_Figure2.pdf]

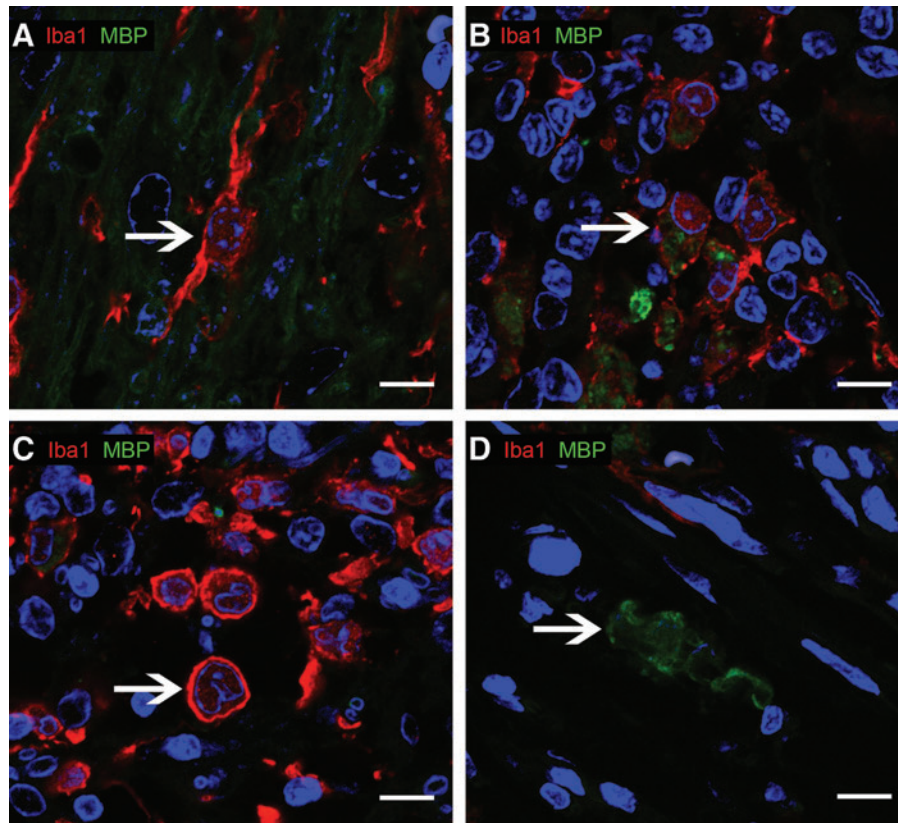

**SUPPLEMENTARY FIG. S2.** High power confocal microscopy images of Iba1<sup>+</sup> (*red*) microglia with a ramified morphology in the uninjured spinal cord tissue away from the lesion site (**A**), cells within the lesion site with less intense Iba1 expression containing intracellular MBP (*green*) (**B**), cells within the lesion site with intense Iba1 expression without intracellular MBP (**C**), and extracellular MBP deposits within the lesion site (**D**) White arrows designate cells or deposits showing typical staining patterns described for each panel. (Scale bars: 10  $\mu$ m).
