# Supplementary material
Source: PubMed Central journal article supplement (PMC4507127)
Supplement: Supp_Figure3.pdf [file Supp_Figure3.pdf]

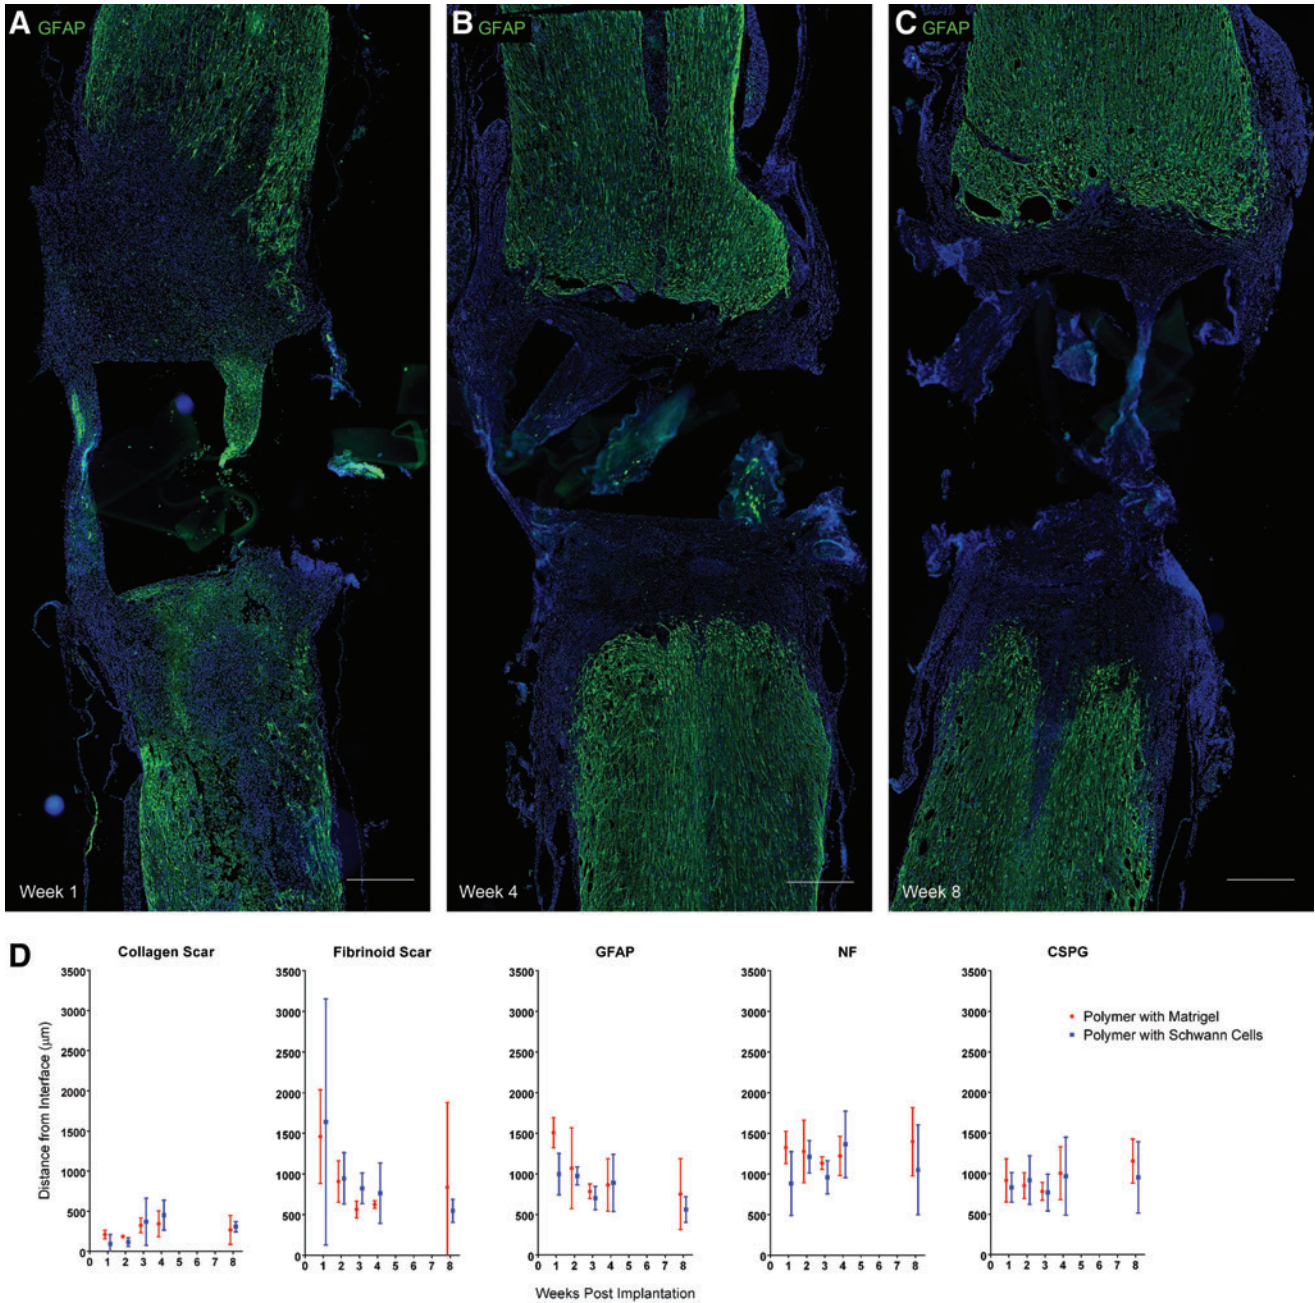

**SUPPLEMENTARY FIG. S3.** GFAP<sup>+</sup> astrocyte staining at 1 week (**A**), 4 weeks (**B**), and 8 weeks (**C**) postpolymer scaffold implantation (Scale bars: 500 µm). (**D**): Quantification of the distance (measured as described in Fig. 1) that the collagen and fibrinoid scar extend from the tissue-scaffold interface, and the distance away from the tissue-scaffold interface of the GFAP<sup>+</sup> astrocytes, NF<sup>+</sup> axons, and perineuronal net CSPG over time in animals implanted with scaffolds containing Schwann cells or Matrigel only.  $p < 0.05$  for main effect of time postimplantation for collagen scar, fibrinoid scar, and GFAP<sup>+</sup> astrocytes distances.
