# Supplementary material
Source: PubMed Central journal article supplement (PMC4507127)
Supplement: Supp_Figure4.pdf [file Supp_Figure4.pdf]

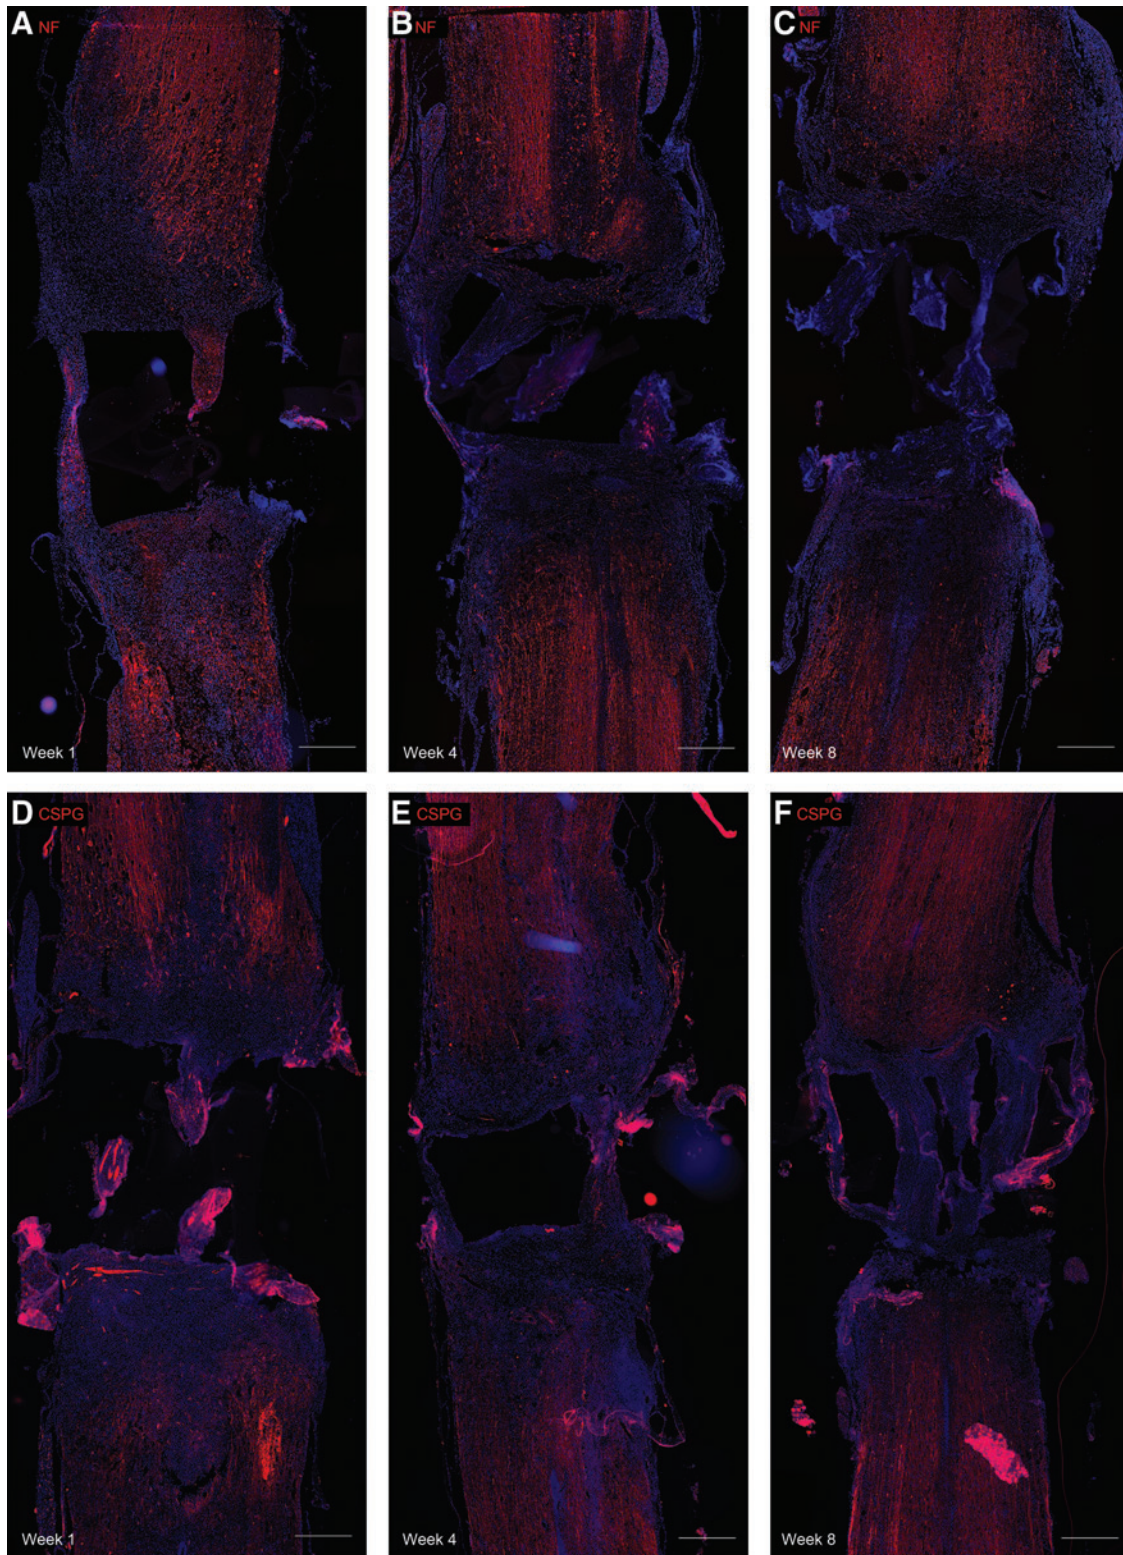

**SUPPLEMENTARY FIG. S4.** NF<sup>+</sup> axon staining at 1 week (A), 4 weeks (B), and 8 weeks (C) postpolymer scaffold implantation (Scale bars: 500  $\mu$ m). Perineuronal net CSPG staining at 1 week (D), 4 weeks (E), and 8 weeks (F) postpolymer scaffold implantation (Scale bars: 500  $\mu$ m).
