# Supplementary material
Source: PubMed Central journal article supplement (PMC4507127)
Supplement: Supp_Figure5.pdf [file Supp_Figure5.pdf]

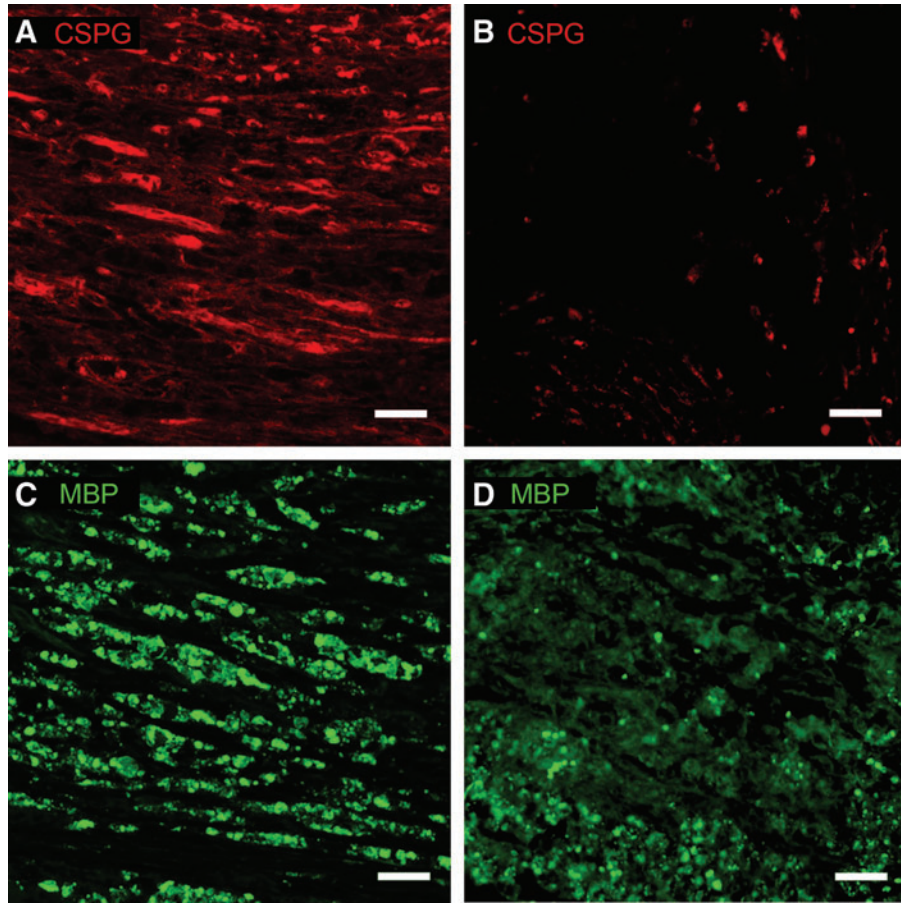

**SUPPLEMENTARY FIG. S5.** High power images of CSPG deposits and MBP debris. CSPG deposits within the lesion site of animals with transection only (**A**) and with implanted polymer scaffolds (**B**) (Scale bars: 50  $\mu$ m). MBP debris within the lesion site of animals with transection only (**C**) and with implanted polymer scaffolds (**D**) (Scale bars: 50  $\mu$ m).
