# Supplementary material
Source: PubMed Central journal article supplement (PMC4507127)
Supplement: Supp_Table1.pdf [file Supp_Table1.pdf]

SUPPLEMENTARY TABLE S1. RESULTS OF THE TWO-WAY ANOVA TESTS REFERRED TO IN THE TEXT

|                                 |                 |          |         |                 |
|---------------------------------|-----------------|----------|---------|-----------------|
| GFP area                        | Total <i>N</i>  | Model DF | F Ratio | <i>p</i> -value |
|                                 | 26              | 5        | 5.4709  | 0.0025          |
|                                 | Effect variable | DF       | F Ratio | <i>p</i> -value |
|                                 | Time × Side     | 2        | 0.8106  | 0.4587          |
|                                 | Time            | 2        | 10.2463 | 0.0009          |
|                                 | Side            | 1        | 4.6499  | 0.0434          |
| Collagen scar area              | Total <i>N</i>  | Model DF | F Ratio | <i>p</i> -value |
|                                 | 45              | 9        | 1.3438  | 0.2508          |
|                                 | Effect variable | DF       | F Ratio | <i>p</i> -value |
|                                 | Time × Group    | 4        | 0.0907  | 0.9848          |
|                                 | Time            | 4        | 2.7147  | 0.0455          |
|                                 | Group           | 1        | 0.5085  | 0.4805          |
| Fibrinoid scar area             | Total <i>N</i>  | Model DF | F Ratio | <i>p</i> -value |
|                                 | 45              | 9        | 3.7983  | 0.002           |
|                                 | Effect variable | DF       | F Ratio | <i>p</i> -value |
|                                 | Time × Group    | 4        | 1.5362  | 0.2131          |
|                                 | Time            | 4        | 7.358   | 0.0002          |
|                                 | Group           | 1        | 0.2069  | 0.652           |
| Collagen scar distance          | Total <i>N</i>  | Model DF | F Ratio | <i>p</i> -value |
|                                 | 45              | 9        | 2.8166  | 0.0134          |
|                                 | Effect variable | DF       | F Ratio | <i>p</i> -value |
|                                 | Time × Group    | 4        | 0.8315  | 0.5143          |
|                                 | Time            | 4        | 5.1995  | 0.0021          |
|                                 | Group           | 1        | 0.001   | 0.9744          |
| Fibrinoid scar distance         | Total <i>N</i>  | Model DF | F Ratio | <i>p</i> -value |
|                                 | 45              | 9        | 1.4093  | 0.2218          |
|                                 | Effect variable | DF       | F Ratio | <i>p</i> -value |
|                                 | Time × Group    | 4        | 0.286   | 0.8851          |
|                                 | Time            | 4        | 2.7038  | 0.0461          |
|                                 | Group           | 1        | 0.1248  | 0.726           |
| GFAP astrocytes distance        | Total <i>N</i>  | Model DF | F Ratio | <i>p</i> -value |
|                                 | 45              | 9        | 2.9026  | 0.0113          |
|                                 | Effect variable | DF       | F Ratio | <i>p</i> -value |
|                                 | Time × Group    | 4        | 0.9525  | 0.4456          |
|                                 | Time            | 4        | 5.3581  | 0.0018          |
|                                 | Group           | 1        | 3.7855  | 0.0598          |
| NF axons distance               | Total <i>N</i>  | Model DF | F Ratio | <i>p</i> -value |
|                                 | 45              | 9        | 1.1003  | 0.3879          |
|                                 | Effect variable | DF       | F Ratio | <i>p</i> -value |
|                                 | Time × Group    | 4        | 1.0059  | 0.4176          |
|                                 | Time            | 4        | 0.8063  | 0.5296          |
|                                 | Group           | 1        | 2.9366  | 0.0954          |
| CSPG perineuronal nets distance | Total <i>N</i>  | Model DF | F Ratio | <i>p</i> -value |
|                                 | 45              | 9        | 0.668   | 0.7316          |
|                                 | Effect variable | DF       | F Ratio | <i>p</i> -value |
|                                 | Time × Group    | 4        | 0.2449  | 0.9108          |
|                                 | Time            | 4        | 1.1596  | 0.3452          |
|                                 | Group           | 1        | 0.3323  | 0.568           |

CSPG, chondroitin sulfate proteoglycan; GFAP, glial fibrillary acidic protein; GFP, green fluorescent protein; NF, neurofilament.
